# Supplementary material
Source: PubMed Central journal article supplement (PMC2771368)
Supplement: NIHMS138792-supplement-1_si_001.pdf [file NIHMS138792-supplement-1_si_001.pdf]

## Supporting Information

Occidiofungin, a Unique Antifungal Glycopeptide Produced by a strain of  
*Burkholderia contaminans*

Shi-En Lu,<sup>‡</sup> Jan Novak,<sup>§</sup> Frank W. Austin,<sup>||</sup> Ganyu Gu,<sup>‡</sup> Dayna Ellis,<sup>Δ</sup> Marion  
Kirk,<sup>Ω</sup> Shawanda Wilson-Stanford,<sup>Δ</sup> Marco Tonelli,<sup>#</sup> and Leif Smith<sup>Δ\*</sup>

Fig S1

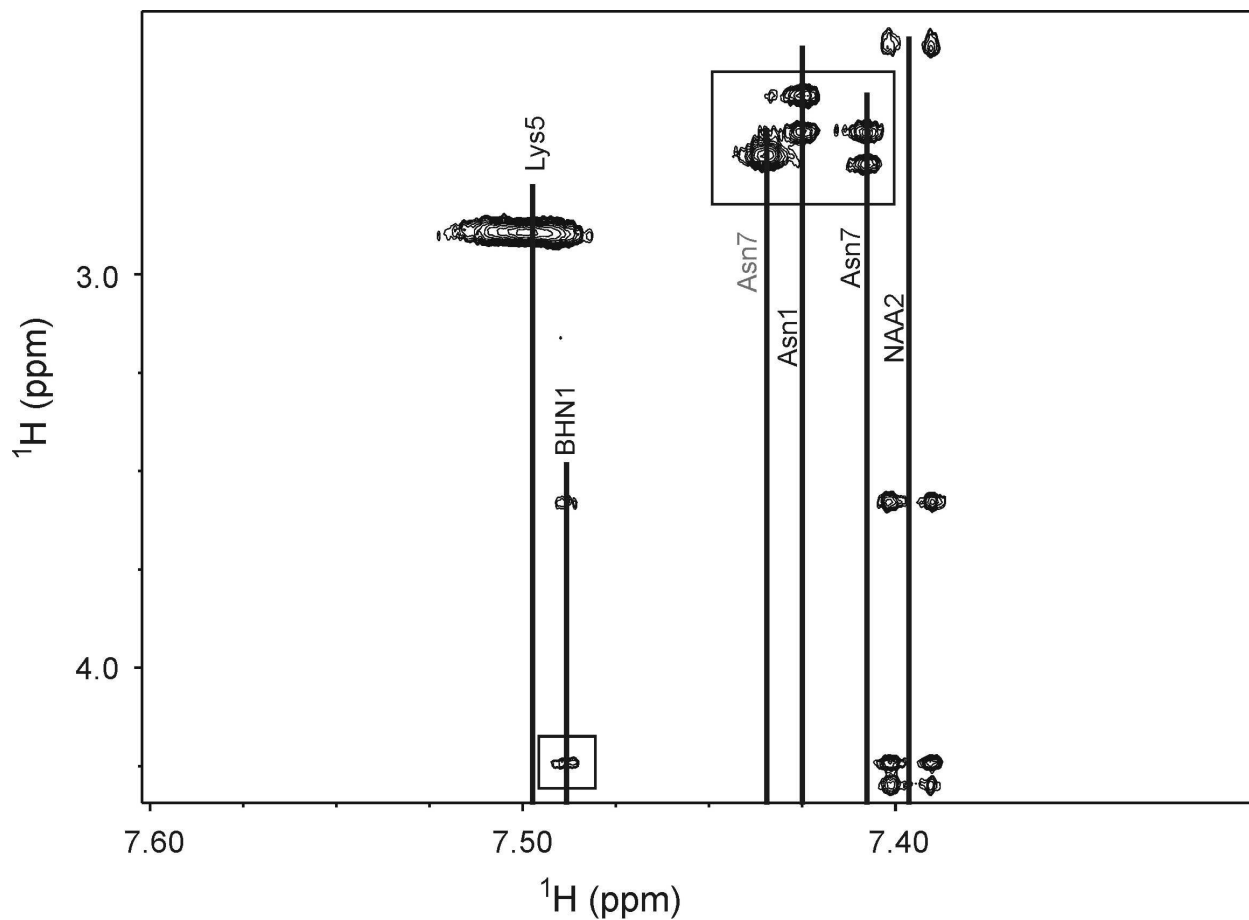

Figure S1. ROESY dataset showing the ROEs from the beta protons to the delta protons of the amino group for Asn1, BHN2, and Asn7. ROEs of interest are demarcated by boxes. These ROEs provide a definitive assignment for the asparagine residues. Asn7 in grey refer to Asn7 for Occidiofungin B.

Fig S2

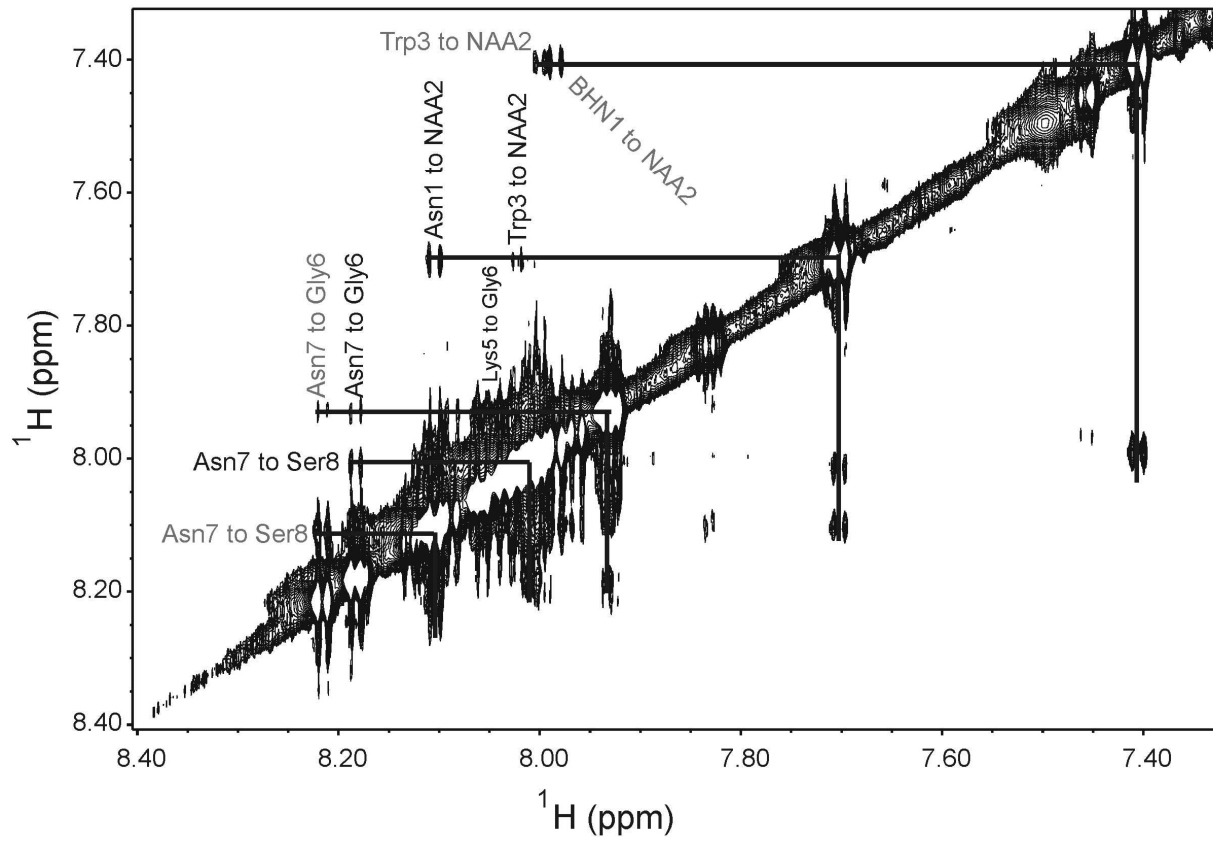

Figure S2. NOESY dataset showing the  $H^N_i$  to  $H^N_{i+1}$  NOEs. These assignments augment the sequential assignment data shown in the manuscript. Residues for occidiofungin A and occidiofungin B are presented in black and grey, respectively.

Fig S3

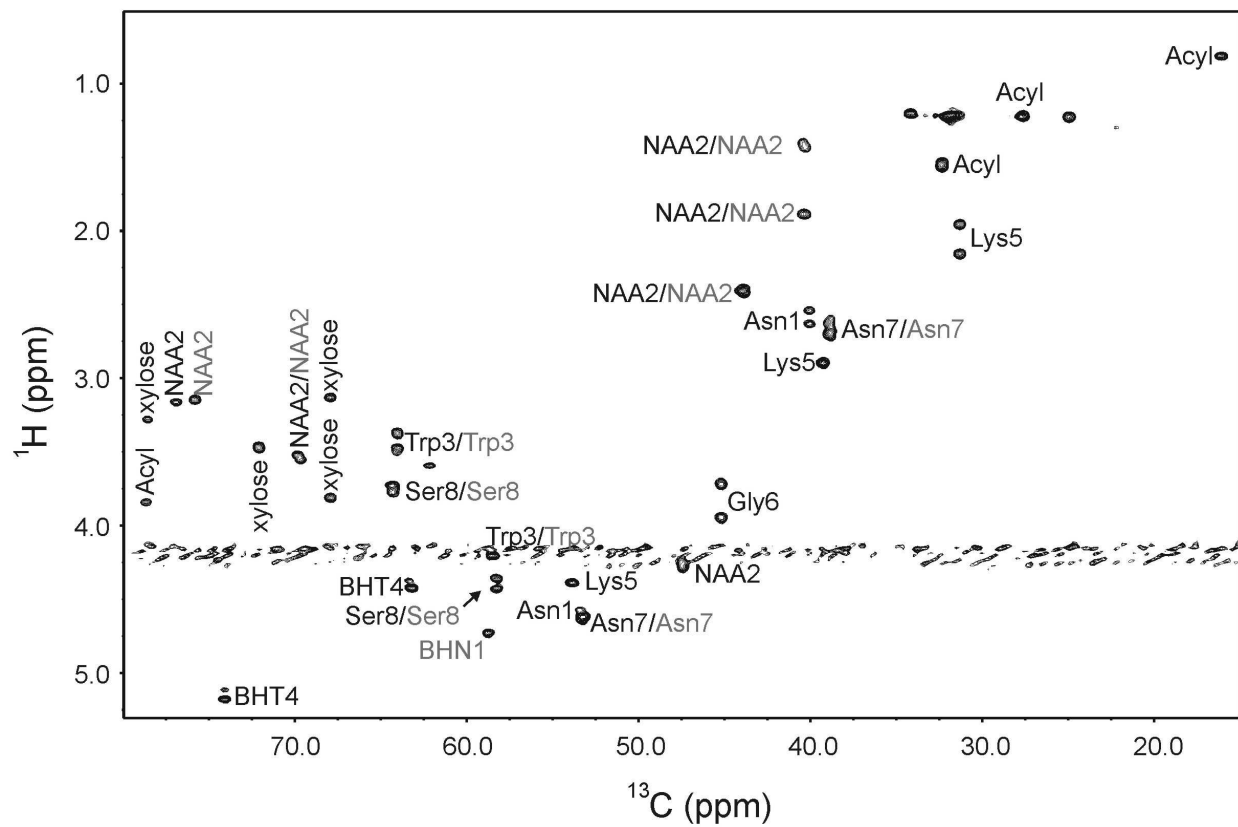

Figure S3. The complete assignment of the <sup>13</sup>C-HSQC dataset. Residues are written next to their representative spectral peaks. Residues for occidiofungin A and occidiofungin B are presented in black and grey, respectively.
